# Supplementary material for: Impact of Seasonal Consumption of Local Tomatoes on the Metabolism and Absorption of (Poly)Phenols in Fischer Rats
Source: MDPI journal article supplement (doi:10.3390/nu14102047), 2022-05-13
Supplement: s1 [file s1]

**Table S1.** Proximate composition of local (LT) and non-local (NLT) tomatoes.

| Components                        | LT           | NLT            |
|-----------------------------------|--------------|----------------|
| Ash                               | 8.61 ± 0.28  | 8.76 ± 0.12    |
| Protein                           | 13.54 ± 0.04 | 12.96 ± 0.00 * |
| Total carbohydrate, by difference | 75.18 ± 0.14 | 75.74 ± 0.14   |
| Total dietary fiber               | 25.26 ± 0.00 | 24.31 ± 1.18   |
| Total sugar                       | 36.98 ± 0.93 | 39.57 ± 0.92 * |
| Total lipid (fat)                 | 2.51 ± 0.03  | 2.49 ± 0.01    |

The results are expressed as g/100 g dry weight (dw) ± standard deviation (SD) ( $n = 3$ ). \* denotes a significant difference ( $p < 0.05$ ) by the Student's  $t$ -test. Table adapted from Cruz-Carrión et al. [1]. LT, local tomatoes; NLT, non-local tomatoes.

**Table S2.** Rat serum metabolites of tomato (poly)phenolic compounds monitored through uHPLC-MS<sup>n</sup>.

| Metabolite                                        | RT   | [M-H] <sup>-</sup><br>(m/z) | MS <sup>2</sup> ions<br>(m/z) | Standard Compound Used for Quantification         |
|---------------------------------------------------|------|-----------------------------|-------------------------------|---------------------------------------------------|
| 3-(3'-methoxyphenyl)propanoic acid-4'-glucuronide | 4.49 | 371                         | <b>175</b> , 113, 195         | 3-(3'-methoxyphenyl)propanoic acid-4'-glucuronide |
| 3-(3'-methoxyphenyl)propanoic acid-4'-sulfate     | 4.60 | 275                         | <b>195</b> , 149              | 3-(3'-methoxyphenyl)propanoic acid-4'-sulfate     |
| 3-(4'-hydroxyphenyl)propanoic acid-3'-glucuronide | 4.33 | 357                         | <b>181</b> , 175, 113, 137    | 3-(4'-hydroxyphenyl)propanoic acid-3'-glucuronide |
| 3-(4'-hydroxyphenyl)propanoic acid-3'-sulfate     | 4.4  | 261                         | <b>181</b> , 135, 137         | 3-(4'-hydroxyphenyl)propanoic acid-3'-sulfate     |
| 3-(4'-methoxyphenyl)propanoic acid-3'-glucuronide | 4.96 | 371                         | <b>175</b> , 195, 113         | 3-(4'-methoxyphenyl)propanoic acid-3'-glucuronide |
| 3'-hydroxycinnamic acid-4'-glucuronide            | 3.68 | 355                         | <b>179</b> , 175, 135, 113    | 3'-hydroxycinnamic acid-4'-glucuronide            |
| 3'-methoxycinnamic acid-4'-glucuronide            | 4.12 | 369                         | <b>175</b> , 193, 113, 178    | 3'-methoxycinnamic acid-4'-glucuronide            |
| 3'-methoxycinnamic acid-4'-sulfate                | 4.70 | 273                         | <b>193</b> , 229, 149         | 3'-methoxycinnamic acid-4'-sulfate                |
| 4'-hydroxycinnamic acid-3'-glucuronide            | 4.37 | 355                         | <b>179</b> , 175, 135         | 3'-hydroxycinnamic acid-4'-glucuronide            |
| 4'-methoxycinnamic acid-3'-glucuronide            | 4.89 | 371                         | <b>175</b> , 113, 193         | 3'-methoxycinnamic acid-4'-glucuronide            |
| 4'-methoxycinnamic acid-3'-sulfate                | 5.06 | 273                         | <b>193</b> , 149              | 3'-methoxycinnamic acid-4'-sulfate                |
| Hydroxycinnamic acid-sulfate I                    | 4.36 | 259                         | <b>179</b> , 215, 135         | 3-(4'-hydroxyphenyl)propanoic acid-3'-sulfate     |
| Hydroxycinnamic acid-sulfate II                   | 4.65 | 259                         | <b>179</b> , 215, 135         | 3-(4'-hydroxyphenyl)propanoic acid-3'-sulfate     |
| Naringenin-4'-glucuronide                         | 6.74 | 447                         | <b>271</b> , 175              | Quercetin-3-glucuronide                           |
| Naringenin-7-glucuronide                          | 6.64 | 447                         | <b>271</b> , 175              | Quercetin-3-glucuronide                           |
| Quercetin-3-glucuronide                           | 5.96 | 477                         | <b>301</b> , 179              | Quercetin-3-glucuronide                           |
| Quercetin-3'-sulfate                              | 7.46 | 381                         | <b>301</b> , 179              | Quercetin-3'-sulfate                              |

The fragment ions are reported in their order of relative abundance. Quantifier ions are reported in bold. Standard of both naringenin-glucuronides have been only used for identification because of their lower purity than standard of quercetin-3-glucuronide. The limit of detection (LOD) and quantification (LOQ) for all used standards were evaluated. For glucuronide standards (LOD = 0.01  $\mu$ M, LOQ = 0.05  $\mu$ M) and for sulfate standards (LOD = 0.001  $\mu$ M, LOQ = 0.005  $\mu$ M). uHPLC-MS<sup>n</sup>, ultra-high-performance liquid chromatography coupled with mass spectrometry and linear ion trap mass spectrometric; RT, retention time.

Filename: nutrients-1711945-supplementary.docx  
Directory: E:\5.12\symmetry-1257029  
Template: C:\Users\MDPI\AppData\Roaming\Microsoft\Templates\Normal.dotm  
Title: T  
Subject:  
Author: MDPI  
Keywords:  
Comments:  
Creation Date: 4/20/2022 4:48:00 PM  
Change Number: 8  
Last Saved On: 5/13/2022 3:53:00 PM  
Last Saved By: MDPI 94  
Total Editing Time: 13 Minutes  
Last Printed On: 5/13/2022 5:41:00 PM  
As of Last Complete Printing  
Number of Pages: 2  
Number of Words: 879 (approx.)  
Number of Characters: 4,831 (approx.)
